# Supplementary material for: In situ reversible tuning of chemical interface damping in mesoporous silica-coated gold nanorods via direct adsorption and removal of thiol
Source: Royal Society of Chemistry journal article supplement (doi:10.1039/d3an00909b), 2023-01-01

# Figure S1

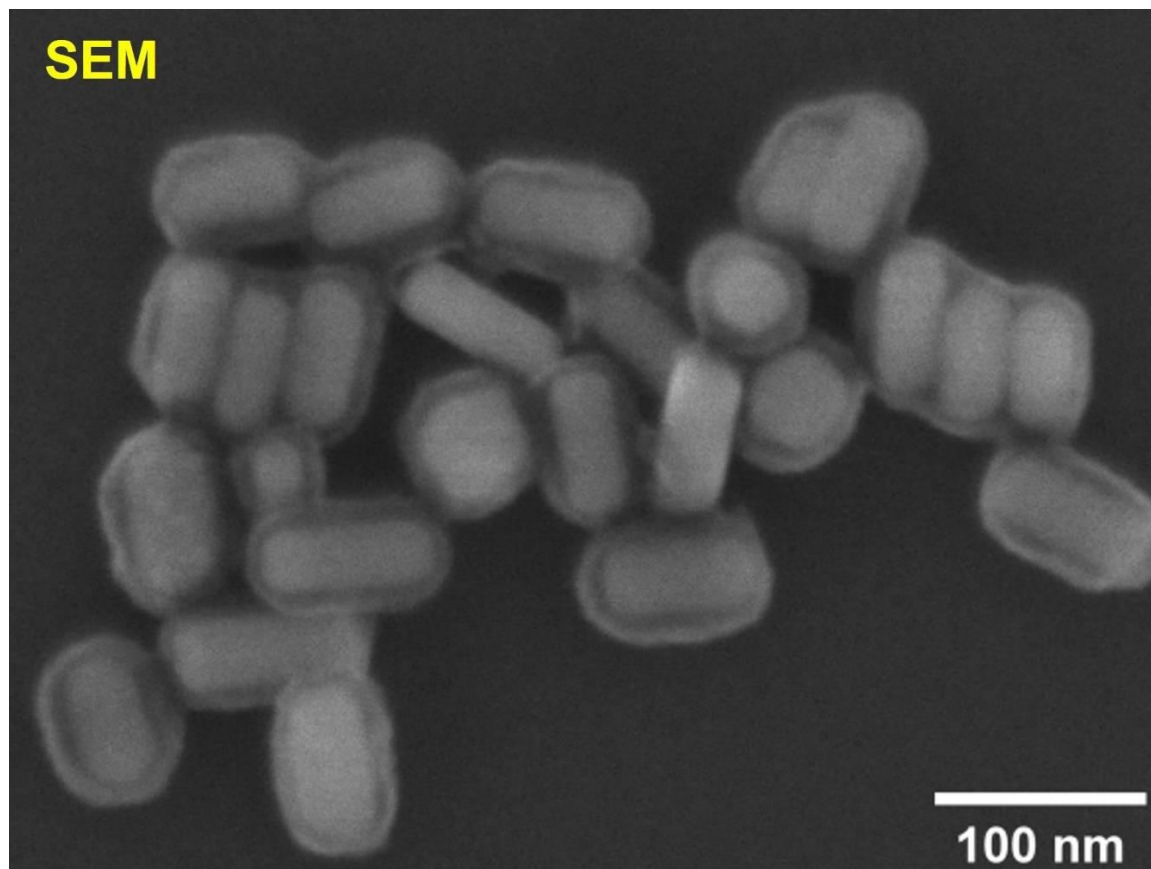

# Figure S2

## A

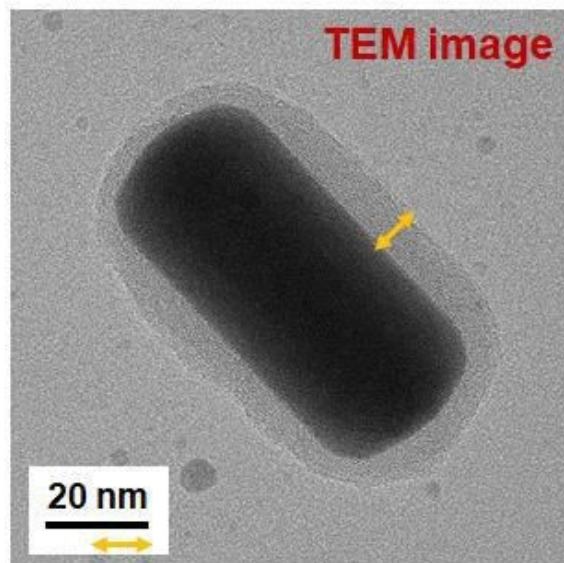

AuNR@mSiO<sub>2</sub>

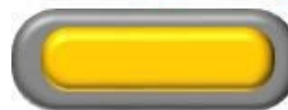

AuNR Core:  
40 nm × 120 nm

## B

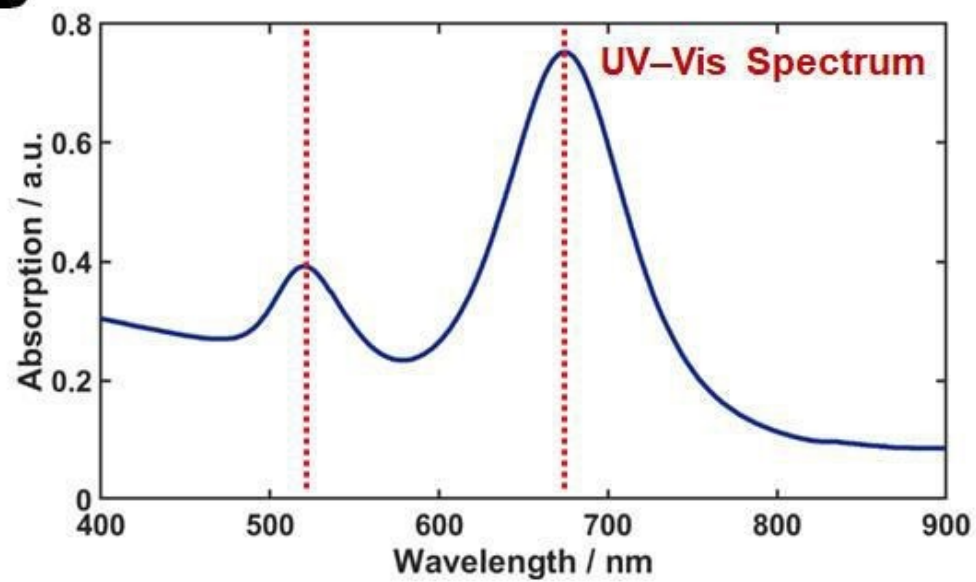

# Figure S3

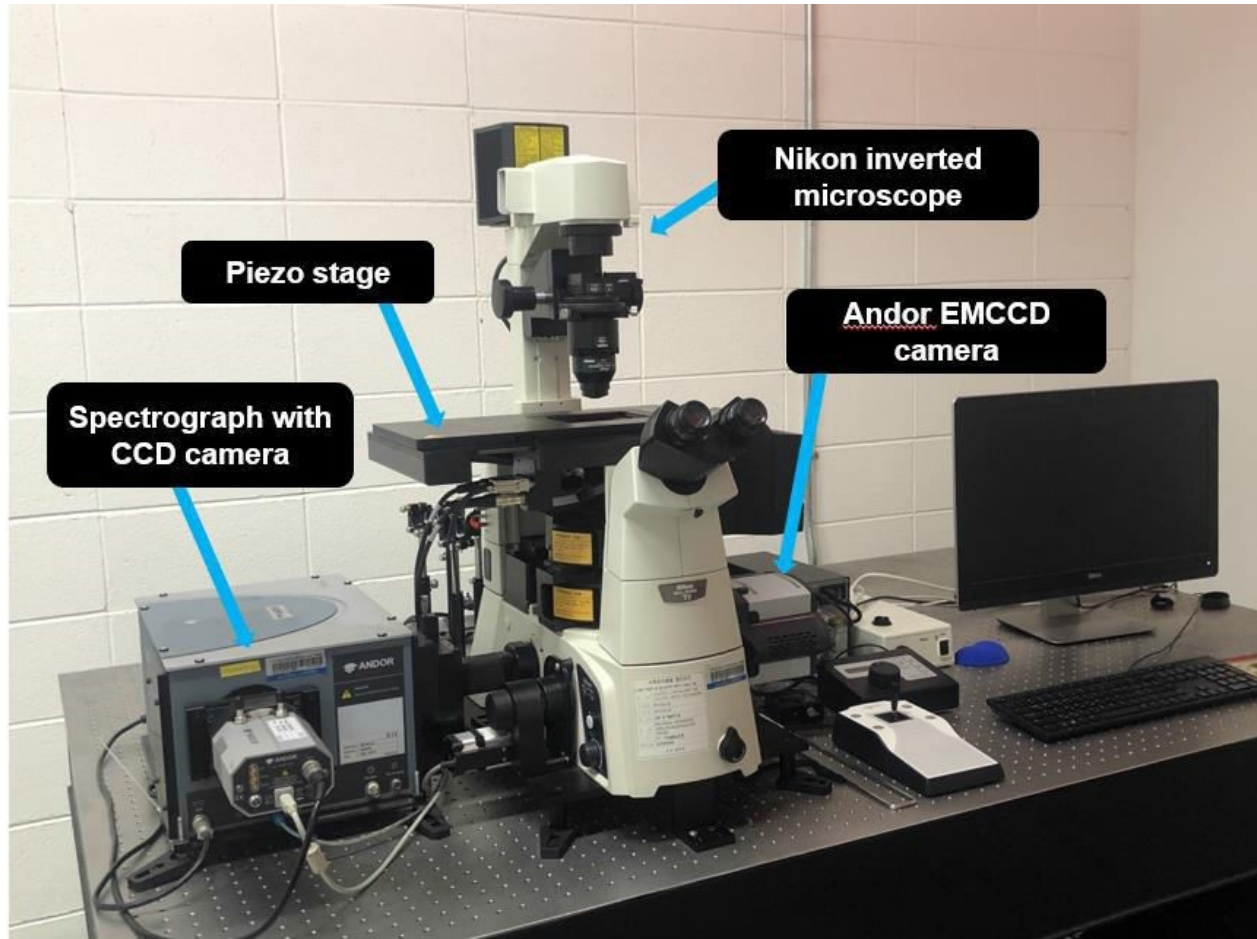

# Figure S4

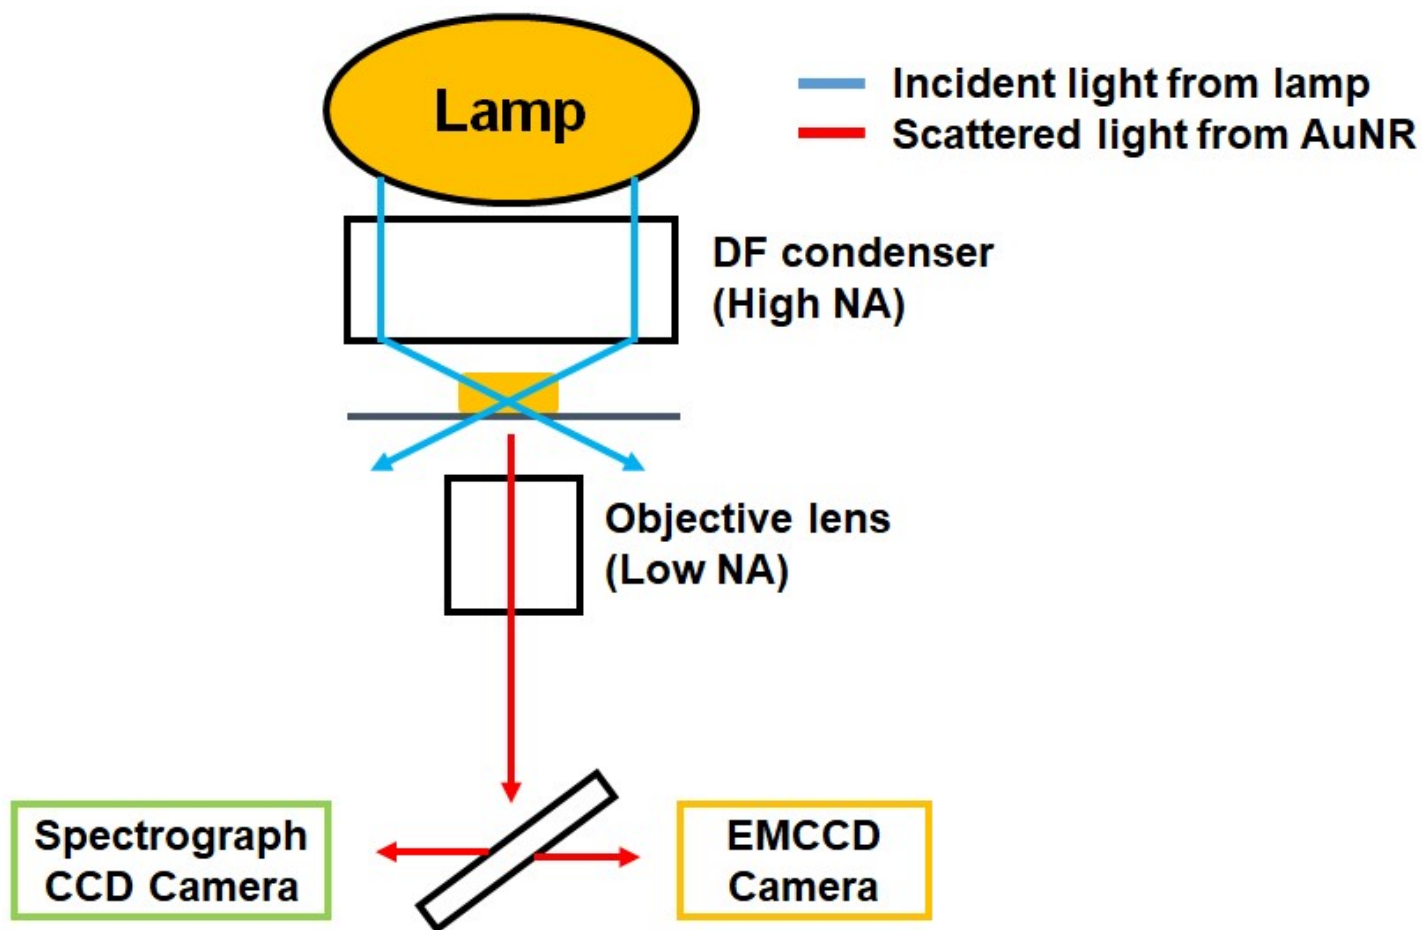

**Figure S5**

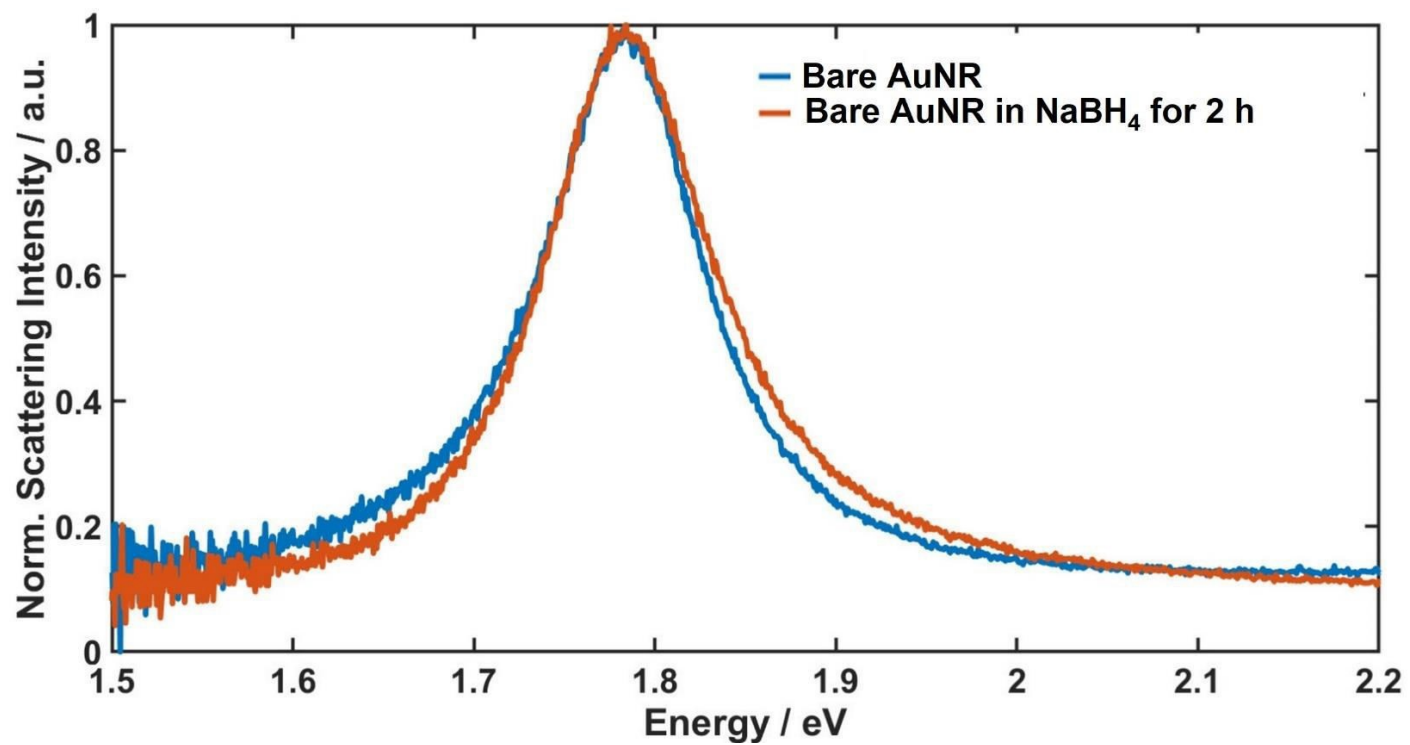

# Figure S6

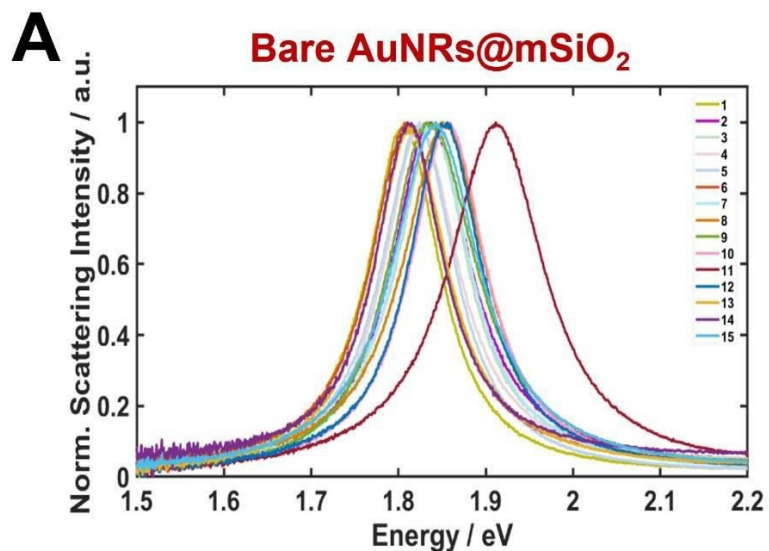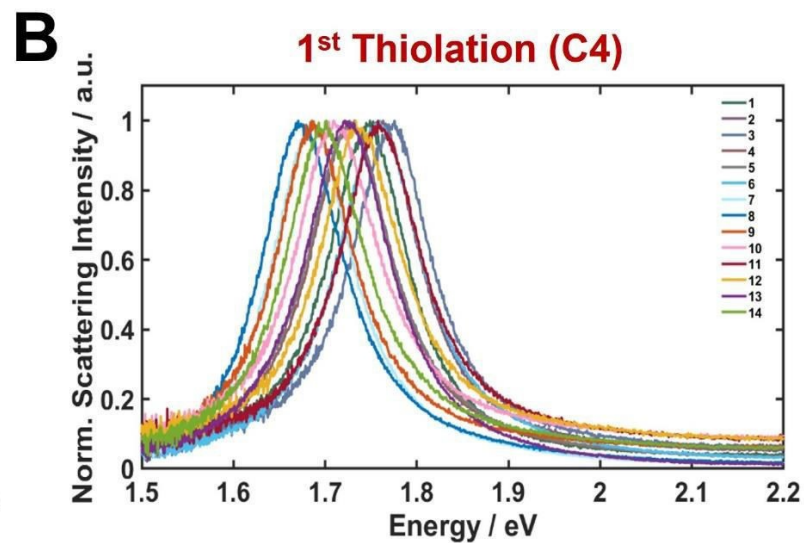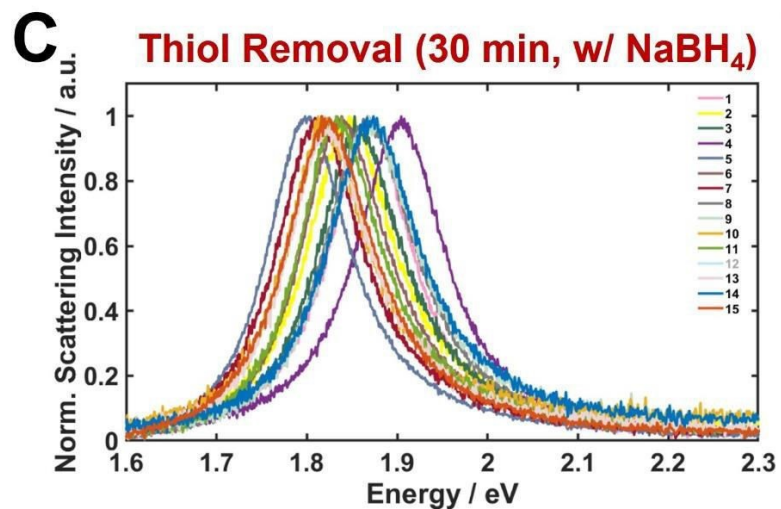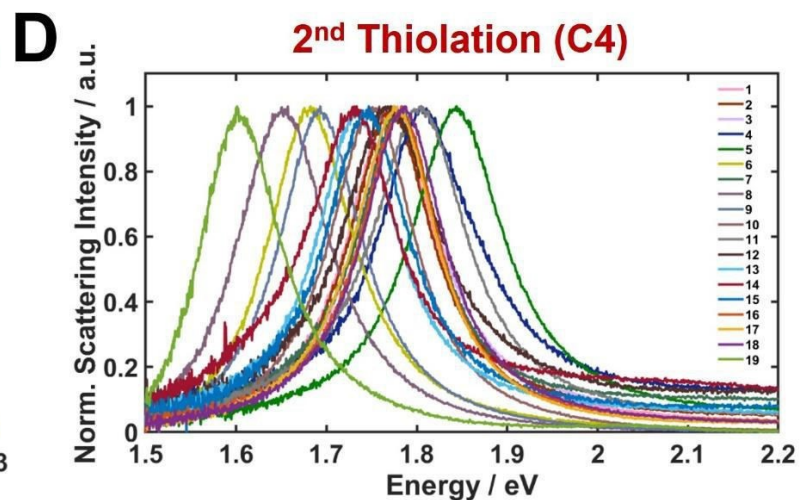

# Figure S7

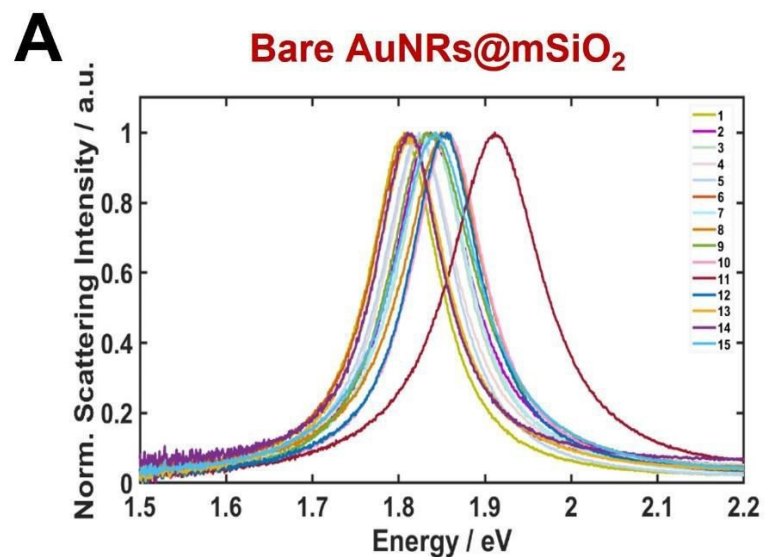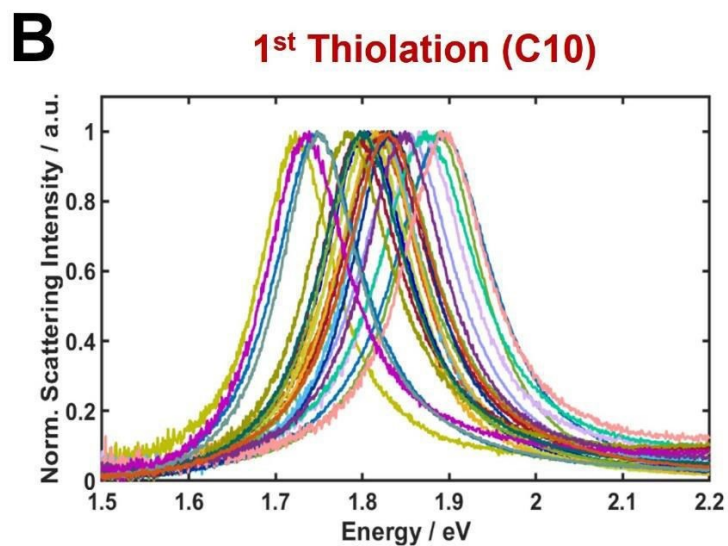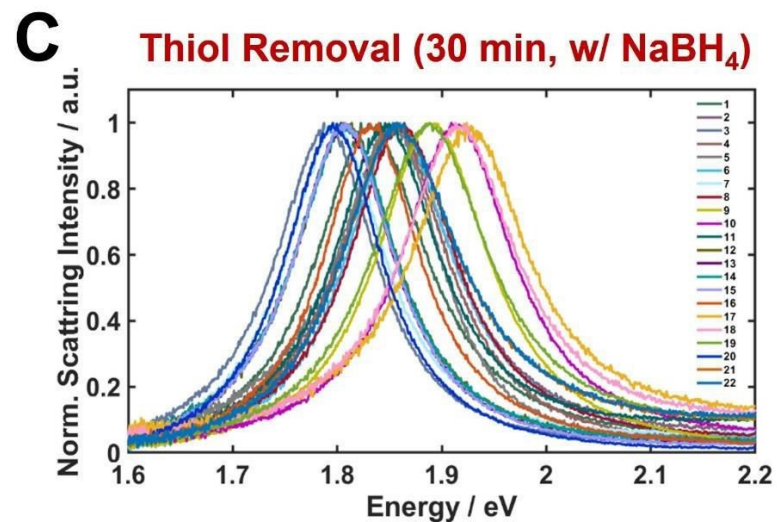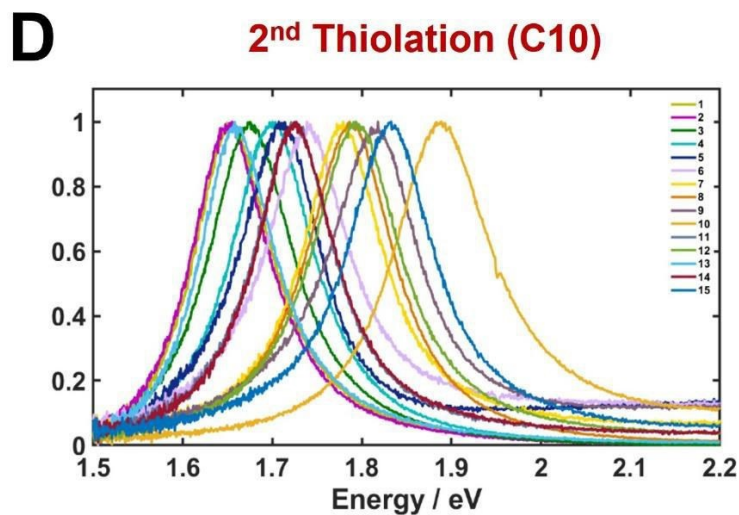

Figure S8

A

Immersion Time Dependence

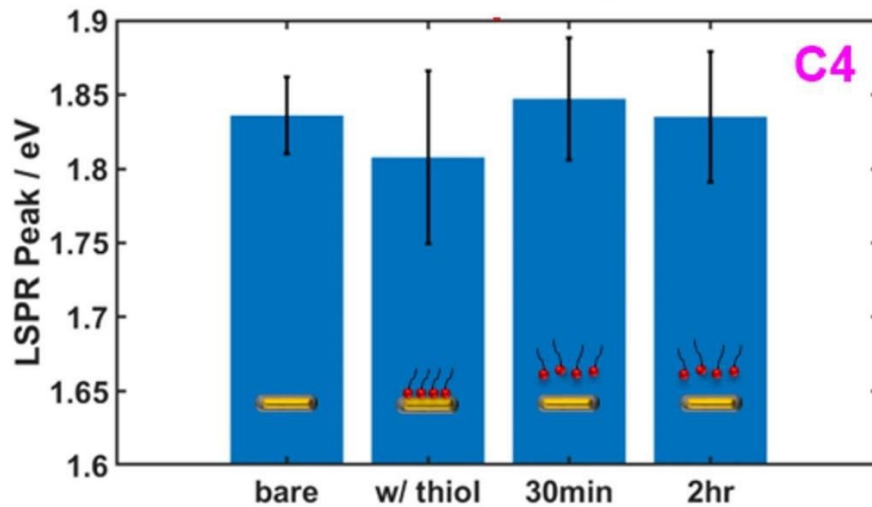

B

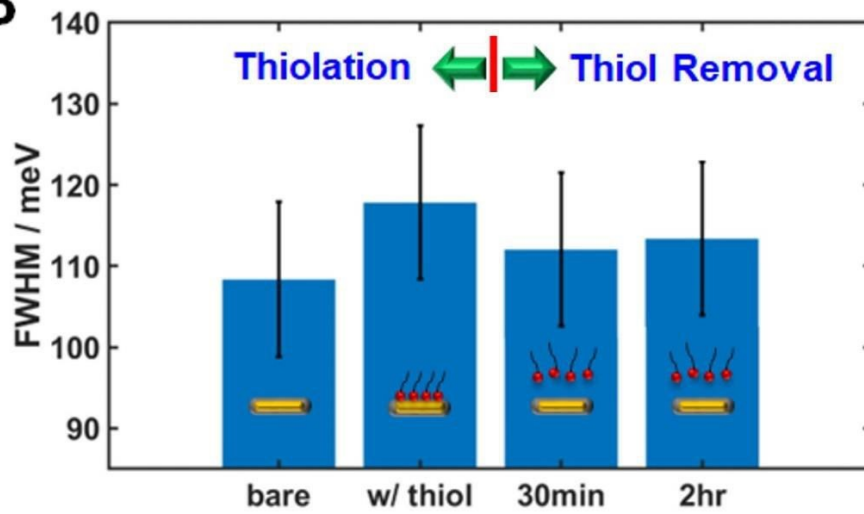

Supplement: d3an00909b1.pdf [file d3an00909b1.pdf]
